# Supplementary material for: Strengthening the integration of eye care into the health system: methodology for the development of the WHO package of eye care interventions
Source: PubMed Central journal article supplement — BMJ Open Ophthalmol. 2020 Aug 11;5(1):e000533. doi: 10.1136/bmjophth-2020-000533 (PMC7418692; doi:10.1136/bmjophth-2020-000533), 2020-08-11
Supplement: bmjophth-2020-000533supp001.pdf [file bmjophth-2020-000533supp001.pdf]

## **Appendix 1. Guideline databases and professional association websites that were searched**

### **Guideline databases**

1. Guidelines International Network
2. National Institute for Clinical Excellence ([UK](#))
3. eGuidelines
4. Guideline Central
5. ECRI Guidelines Trust Database
6. Australian National Health and Medical Research Council clinical practice guidelines
7. Canadian Medical Association Infobase of Clinical Practice Guidelines
8. Trip Database
9. WHO guidelines
10. US Preventive Services Task Force Guideline
11. Scottish Intercollegiate Guidelines Network (SIGN)

### **Professional association websites**

1. College of Optometrists (UK)
2. Pan American Association of Ophthalmology
3. Eastern Mediterranean Council of Optometry
4. European Society of Ophthalmology
5. World Council of Optometry
6. American Academy of Ophthalmology
7. American Optometric Association
8. Asia Pacific Council of Optometry
9. International Council of Ophthalmology
10. Royal Australian and New Zealand College of Ophthalmologists
11. Royal College of Ophthalmologists
12. European Society of Cataract and Refractive Surgeons
13. American Society of Cataract and Refractive Surgeons
14. European Vitreoretinal Society
15. African Ophthalmology Council
16. Asia Pacific Academy of Ophthalmology
